# Supplementary material for: Complexes of 1,3-Diisobutyl Thiourea with Copper(I), Zinc(II) and Mercury(II): Their Antioxidant and Antibacterial Evaluation
Source: MDPI journal article supplement (doi:10.3390/cryst11080989), 2021-08-20
Supplement: s1 [file s1]

# Complexes of 1,3-diisobutyl thiourea with Copper(I), zinc(II) and mercury(II); their antioxidant and antibacterial evaluation

Adnan Shahzad, Ezzat Khan, Muhammad Said, Gul Shazada Khan, Mian Gul Syed, Awal Noor, Muhammad Zahoor, Riaz Ullah and Ahmed Bari

NMR chemical shifts of free ligand,

**$^1\text{H-NMR}$**  (300 MHz,  $\text{CDCl}_3$ );  $\delta$  (ppm) = 5.89 (br, 2H, NH), 3.21 (br, 4H, N-CH<sub>2</sub>), 1.89 (sep. 2H, CH), 0.92 (d, 12H, Me,  $^3J(1\text{H},1\text{H}) = 6.7$  Hz);  **$^{13}\text{C-NMR}$**  (75.8 MHz,  $\text{CDCl}_3$ );  $\delta$  (ppm) = 181.7 (CS), 51.9 (N-CH<sub>2</sub>), 28.1 (CH), 20.2 (Me).

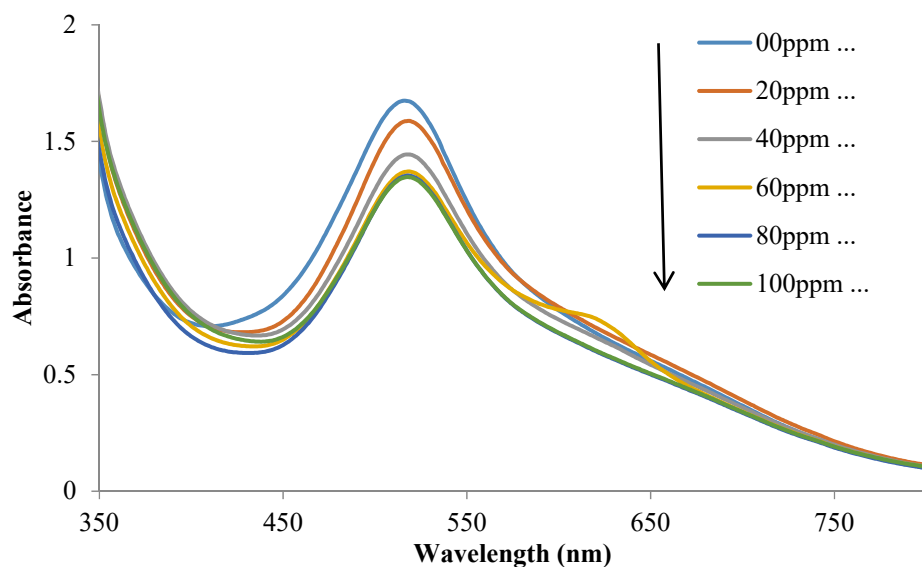

**Figure S1.** Absorption spectra of DPPH in the absence of compound **2** (Top spectra) and presence of increasing concentration of the compound (20, 40, 60, 80 & 100 ppm). Arrow shows the change in absorption as a function of activity with respect to increasing concentration of compound **2**.

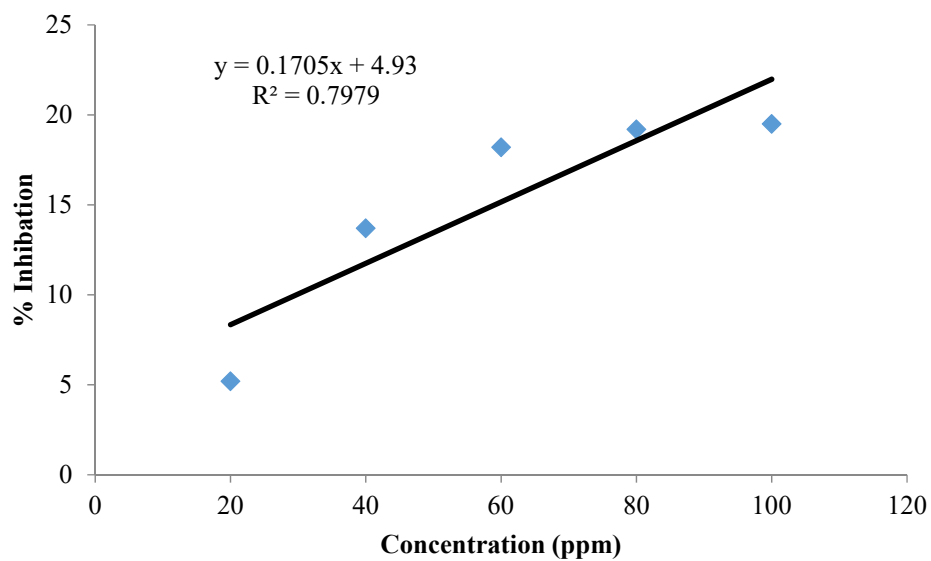

**Figure S2.** Plot of % Inhibition versus concentration of compound **2** for radical scavenging activity.

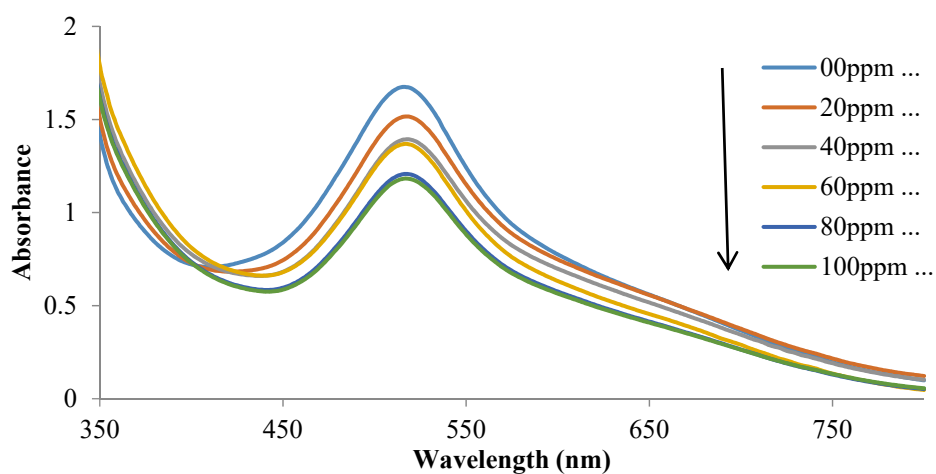

**Figure S3.** Absorption spectra of pure DPPH, the absorbance decreased when compounds **3** was added, in a dose dependent manner.

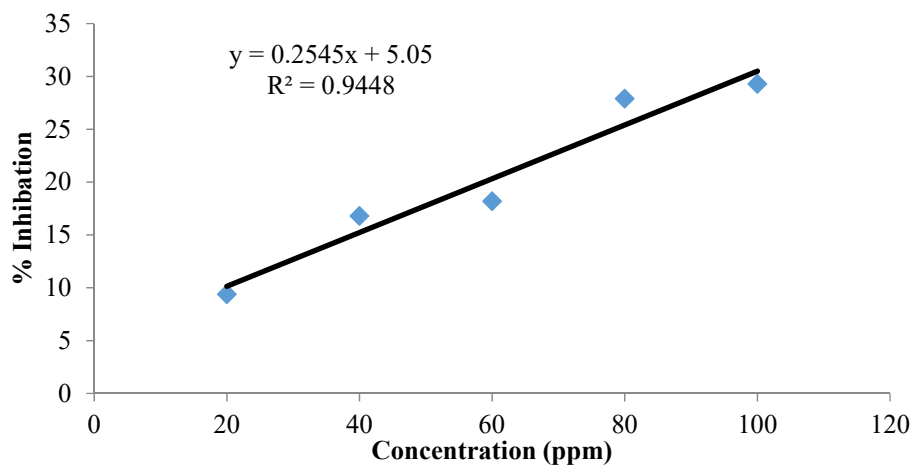

**Figure S4.** Percent inhibition versus concentration of compound **3** for radical scavenging activity.

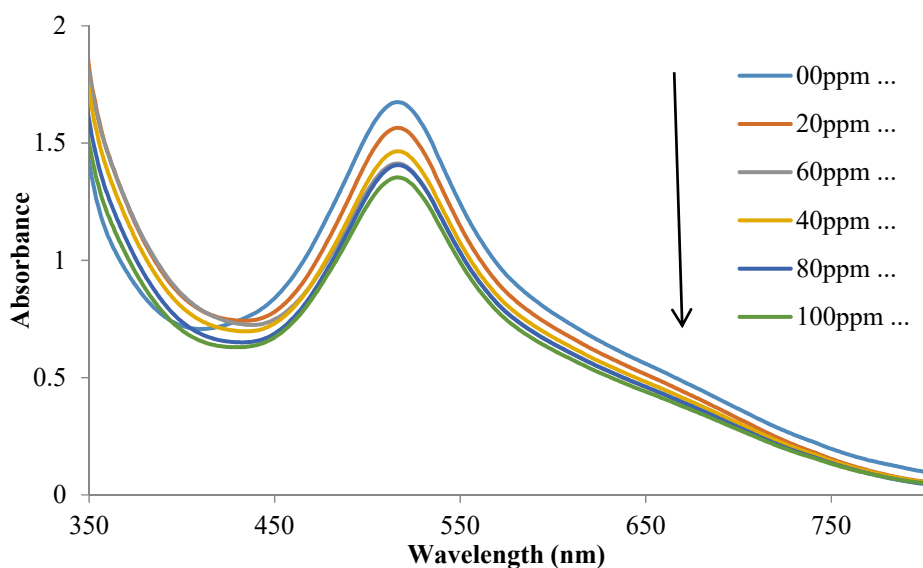

**Figure S5.** Absorption spectra of free radical (DPPH) in the absence (Top spectra) and presence of increased concentration of the compound **4** (20, 40, 60, 80 & 100 ppm). Arrow show the change in spectra on increasing concentration of compound.

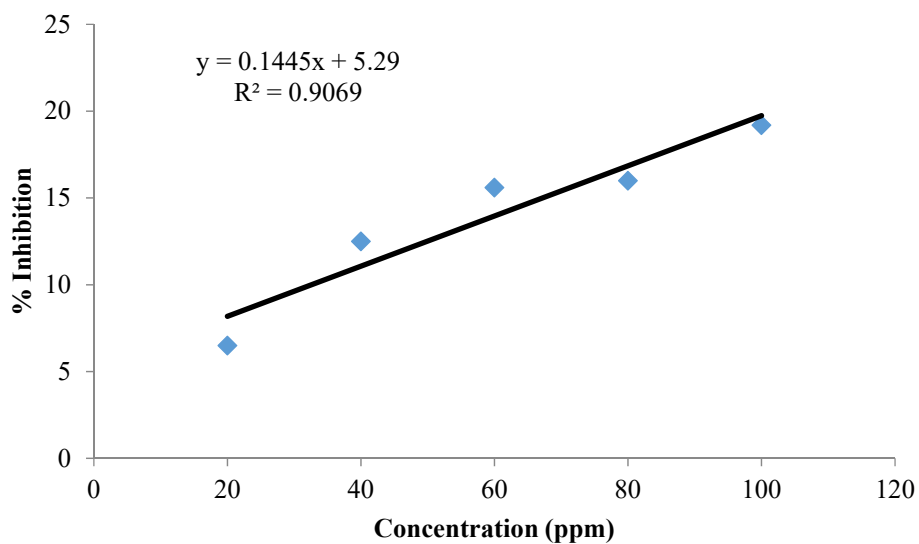

**Figure S6.** Plot of % Inhibition versus concentration of compound **4** for radical scavenging activity.
